# Supplementary material for: Contact Bioassays with Phenoxybenzyl and Tetrafluorobenzyl Pyrethroids against Target-Site and Metabolic Resistant Mosquitoes
Source: PubMed Central journal article supplement (PMC4773128; doi:10.1371/journal.pone.0149738), 2016-03-01
Supplement: pone.0149738.s002.pdf [file pone.0149738.s002.pdf]

**S1 Table:** Knockdown results of the glazed tile contact bioassay using technical grade type II pyrethroids (surface concentration shown in the respective row) with and without the addition of piperonyl butoxide (1600 ppm) against three different mosquito strains.

|                                   | concentration<br>[mg/m <sup>2</sup> ] | <i>deltamethrin</i><br>%<br>knockdown<br>1 hour after<br>contact | <i>deltamethrin</i><br>+ PBO<br>%<br>knockdown<br>1 hour after<br>contact | <i>β-cyfluthrin</i><br>%<br>knockdown<br>1 hour after<br>contact | <i>β-cyfluthrin</i><br>+ PBO<br>%<br>knockdown<br>1 hour after<br>contact | <i>cypermethrin</i><br>%<br>knockdown<br>1 hour after<br>contact | <i>cypermethrin</i><br>+ PBO<br>%<br>knockdown<br>1 hour after<br>contact |
|-----------------------------------|---------------------------------------|------------------------------------------------------------------|---------------------------------------------------------------------------|------------------------------------------------------------------|---------------------------------------------------------------------------|------------------------------------------------------------------|---------------------------------------------------------------------------|
| <i>Aedes aegypti</i><br>[Monheim] | 200                                   | n.t.                                                             | n.t.                                                                      | n.t.                                                             | n.t.                                                                      | 100                                                              | 100                                                                       |
|                                   | 100                                   | 100                                                              | 100                                                                       | 100                                                              | 100                                                                       | 100                                                              | 100                                                                       |
|                                   | 20                                    | 100                                                              | 100                                                                       | 100                                                              | 100                                                                       | 100                                                              | 100                                                                       |
|                                   | 4                                     | 100                                                              | 100                                                                       | 100                                                              | 100                                                                       | 100                                                              | 100                                                                       |
|                                   | 0.8                                   | 100                                                              | 100                                                                       | 100                                                              | 100                                                                       | 100                                                              | 100                                                                       |
|                                   | 0.16                                  | 100                                                              | 100                                                                       | 100                                                              | 100                                                                       | 100                                                              | 100                                                                       |
|                                   | 0.032                                 | 100                                                              | 100                                                                       | 100                                                              | 100                                                                       | 100                                                              | 95                                                                        |
|                                   | 0.0064                                | 100                                                              | 90                                                                        | 65                                                               | 90                                                                        | 60                                                               | 20                                                                        |
|                                   | 0.00128                               | 30                                                               | 5                                                                         | 10                                                               | 0                                                                         | 0                                                                | 0                                                                         |
| <i>An. gambiae</i><br>[RSPH]      | 200                                   | n.t.                                                             | n.t.                                                                      | n.t.                                                             | n.t.                                                                      | 100                                                              | 100                                                                       |
|                                   | 100                                   | 100                                                              | 100                                                                       | 100                                                              | 100                                                                       | 100                                                              | 100                                                                       |
|                                   | 20                                    | 100                                                              | 100                                                                       | 100                                                              | 100                                                                       | 100                                                              | 100                                                                       |
|                                   | 4                                     | 100                                                              | 100                                                                       | 100                                                              | 100                                                                       | 100                                                              | 100                                                                       |
|                                   | 0.8                                   | 100                                                              | 100                                                                       | 100                                                              | 100                                                                       | 100                                                              | 100                                                                       |
|                                   | 0.16                                  | 80.75                                                            | 100                                                                       | 100                                                              | 100                                                                       | 85                                                               | 100                                                                       |
|                                   | 0.032                                 | 50                                                               | 100                                                                       | 87.5                                                             | 97.5                                                                      | 60                                                               | 85                                                                        |
|                                   | 0.0064                                | 20                                                               | 67.5                                                                      | 30                                                               | 62.5                                                                      | 35                                                               | 40                                                                        |
|                                   | 0.00128                               | 0.25                                                             | 7.5                                                                       | 0                                                                | 27.5                                                                      | 22.5                                                             | 7.5                                                                       |
| <i>An. funestus</i><br>[FUMOZ-R]  | 200                                   | n.t.                                                             | n.t.                                                                      | n.t.                                                             | n.t.                                                                      | 100                                                              | 100                                                                       |
|                                   | 100                                   | 100                                                              | 100                                                                       | 100                                                              | 100                                                                       | 95                                                               | 100                                                                       |
|                                   | 20                                    | 90                                                               | 100                                                                       | 100                                                              | 100                                                                       | 75                                                               | 100                                                                       |
|                                   | 4                                     | 60                                                               | 100                                                                       | 85                                                               | 100                                                                       | 75                                                               | 100                                                                       |
|                                   | 0.8                                   | 45                                                               | 100                                                                       | 30                                                               | 100                                                                       | 25                                                               | 100                                                                       |
|                                   | 0.16                                  | 20                                                               | 100                                                                       | 20                                                               | 100                                                                       | 10                                                               | 100                                                                       |
|                                   | 0.032                                 | 10                                                               | 100                                                                       | 0                                                                | 95                                                                        | 10                                                               | 100                                                                       |
|                                   | 0.0064                                | 0                                                                | 80                                                                        | 5                                                                | 80                                                                        | 5                                                                | 45                                                                        |
|                                   | 0.00128                               | 0                                                                | 15                                                                        | 0                                                                | 0                                                                         | 0                                                                | 20                                                                        |
