# Supplementary material for: Contact Bioassays with Phenoxybenzyl and Tetrafluorobenzyl Pyrethroids against Target-Site and Metabolic Resistant Mosquitoes
Source: PubMed Central journal article supplement (PMC4773128; doi:10.1371/journal.pone.0149738), 2016-03-01
Supplement: pone.0149738.s003.pdf [file pone.0149738.s003.pdf]

**S2 Table:** *Knockdown* results of the glazed tile contact bioassay using technical grade type I pyrethroids (surface concentration shown in the respective row) with and without the addition of piperonyl butoxide (1600 ppm) against three different mosquito strains.

|                                   | concentration<br>[mg/m <sup>2</sup> ] | <i>permethrin</i><br>%<br>knockdown<br>1 hour after<br>contact | <i>permethrin</i><br>+ PBO<br>%<br>knockdown<br>1 hour after<br>contact | <i>transfluthrin</i><br>%<br>knockdown<br>1 hour after<br>contact | <i>transfluthrin</i><br>+ PBO<br>%<br>knockdown<br>1 hour after<br>contact | nonfluorinated<br><i>transfluthrin</i><br>% knockdown<br>1 hour after<br>contact | nonfluorinated<br><i>transfluthrin</i> +<br>PBO<br>% knockdown<br>1 hour after<br>contact |
|-----------------------------------|---------------------------------------|----------------------------------------------------------------|-------------------------------------------------------------------------|-------------------------------------------------------------------|----------------------------------------------------------------------------|----------------------------------------------------------------------------------|-------------------------------------------------------------------------------------------|
| <i>Aedes aegypti</i><br>[Monheim] | 200                                   | n.t.                                                           | n.t.                                                                    | n.t.                                                              | n.t.                                                                       | n.t.                                                                             | n.t.                                                                                      |
|                                   | 100                                   | 100                                                            | 100                                                                     | 100                                                               | 100                                                                        | 100                                                                              | 100                                                                                       |
|                                   | 20                                    | 100                                                            | 100                                                                     | 100                                                               | 100                                                                        | 100                                                                              | 100                                                                                       |
|                                   | 4                                     | 100                                                            | 100                                                                     | 100                                                               | 100                                                                        | 100                                                                              | 100                                                                                       |
|                                   | 0.8                                   | 95                                                             | 100                                                                     | 100                                                               | 100                                                                        | 65                                                                               | 100                                                                                       |
|                                   | 0.16                                  | 90                                                             | 100                                                                     | 100                                                               | 100                                                                        | 5                                                                                | 100                                                                                       |
|                                   | 0.032                                 | 20                                                             | 40                                                                      | 100                                                               | 100                                                                        | 0                                                                                | 25                                                                                        |
|                                   | 0.0064                                | 0                                                              | 0                                                                       | 55                                                                | 55                                                                         | 0                                                                                | 5                                                                                         |
|                                   | 0.00128                               | 0                                                              | 0                                                                       | 50                                                                | 10                                                                         | 0                                                                                | 0                                                                                         |
| <i>An. gambiae</i><br>[RSPH]      | 200                                   | n.t.                                                           | n.t.                                                                    | n.t.                                                              | n.t.                                                                       | n.t.                                                                             | n.t.                                                                                      |
|                                   | 100                                   | 100                                                            | 100                                                                     | 100                                                               | 100                                                                        | 100                                                                              | 100                                                                                       |
|                                   | 20                                    | 100                                                            | 100                                                                     | 100                                                               | 100                                                                        | 100                                                                              | 100                                                                                       |
|                                   | 4                                     | 100                                                            | 100                                                                     | 100                                                               | 100                                                                        | 100                                                                              | 100                                                                                       |
|                                   | 0.8                                   | 65                                                             | 65                                                                      | 100                                                               | 100                                                                        | 5                                                                                | 100                                                                                       |
|                                   | 0.16                                  | 17.5                                                           | 25                                                                      | 100                                                               | 100                                                                        | 0                                                                                | 30                                                                                        |
|                                   | 0.032                                 | 10                                                             | 20                                                                      | 100                                                               | 90                                                                         | 0                                                                                | 0                                                                                         |
|                                   | 0.0064                                | 5                                                              | 10                                                                      | 60                                                                | 22.5                                                                       | 0                                                                                | 0                                                                                         |
|                                   | 0.00128                               | 2.5                                                            | 0                                                                       | 20                                                                | 5                                                                          | 0                                                                                | 0                                                                                         |
| <i>An. funestus</i><br>[FUMOZ-R]  | 200                                   | n.t.                                                           | n.t.                                                                    | n.t.                                                              | n.t.                                                                       | n.t.                                                                             | n.t.                                                                                      |
|                                   | 100                                   | 100                                                            | 100                                                                     | 100                                                               | 100                                                                        | 100                                                                              | 100                                                                                       |
|                                   | 20                                    | 100                                                            | 100                                                                     | 100                                                               | 100                                                                        | 100                                                                              | 100                                                                                       |
|                                   | 4                                     | 100                                                            | 100                                                                     | 100                                                               | 100                                                                        | 100                                                                              | 100                                                                                       |
|                                   | 0.8                                   | 45                                                             | 100                                                                     | 100                                                               | 100                                                                        | 35                                                                               | 100                                                                                       |
|                                   | 0.16                                  | 0                                                              | 35                                                                      | 100                                                               | 100                                                                        | 10                                                                               | 95                                                                                        |
|                                   | 0.032                                 | 0                                                              | 5                                                                       | 100                                                               | 100                                                                        | 5                                                                                | 20                                                                                        |
|                                   | 0.0064                                | 0                                                              | 0                                                                       | 70                                                                | 90                                                                         | 0                                                                                | 0                                                                                         |
|                                   | 0.00128                               | 0                                                              | 0                                                                       | 45                                                                | 0                                                                          | 0                                                                                | 0                                                                                         |
